# Supplementary material for: Low BACH2 Expression Predicts Adverse Outcome in Chronic Lymphocytic Leukaemia
Source: MDPI journal article supplement (doi:10.3390/cancers14010023), 2021-12-21
Supplement: s1 [file s1]

# Low BACH2 Expression Predicts Adverse Outcome in Chronic Lymphocytic Leukaemia

Carmela Ciardullo, Katarzyna Szoltysek, Peixun Zhou, Monika Pietrowska, Lukasz Marczak, Elaine Willmore, Amir Enshaei, Anna Walaszczyk, Jia Yee Ho, Vikki Rand, Scott Marshall, Andrew G. Hall, Christine J. Harrison, Meera Soundararajan and Jeyanthi Eswaran

## 1. Methods

### 1.1. RNA extraction and qPCR

Total RNA was extracted from peripheral blood mononuclear cells (PBMCs) using GeneJet RNA purification kit (Thermo Scientific). Concentration and purity of the total RNA samples were measured using the NanoDrop ND-1000 Spectrophotometer. cDNA was synthesized with High-Capacity cDNA synthesis kit (Life Technologies) following manufacturer's protocol. Relative quantification of *BCL6* and *BACH2* RNA expression was performed by qPCR based on TaqMan chemistry and carried out in an Applied Biosystems ViiA 7 Real Time PCR System (Applied Biosystems). *GAPDH* was used as reference for the normalization of qPCR and a pool of 5 RNA extracted from peripheral blood of 5 healthy donors was used as a calibrator. All qPCR reactions were performed in duplicate to assess data reproducibility.

TaqMan probes used for this study were: Hs02758991\_g1 (*GAPDH*), Hs00222364\_m1 (*BACH2*), Hs00153368\_m1 (*BCL6*).

### 1.2. RNA expression and Data Analysis

Calculations for RNA expression were made using the comparative CT ( $2^{-\Delta\Delta Ct}$ ) method. The potential diagnostic value of *BCL6* and *BACH2* RNA and protein expression was assessed by a receiver operating characteristic (ROC) curve to identify optimal cut-off point (Figure S2).

*BCL6* and *BACH2* expression was then split at this diagnostic cut-off and the resulting dichotomous variable was included in a Kaplan-Meier overall survival (OS) analysis (Figure 2,3). Prognostic variables associated with OS were identified through univariate analysis by Cox regression models. The hazard ratio (HR) and 95% confidence interval (CI) were calculated using Cox regression models. The independent prognostic variables associated with OS were confirmed by multivariate analysis using Cox proportional hazards model. A prognostic index model was established based on independent variables that were significantly associated with OS in the multivariate analysis (Figure 5). Any differences between OS curves were evaluated using the log-rank test. In *BACH2* and CD38 expression correlation analysis, *BACH2* and CD38 expression were treated as categorical variables, considering *BACH2* expression > 209 as 'high' and *BACH2* expression < 209 as 'low', CD38 > 20% as 'high' and CD38 < 20% as low. All statistical calculations were performed using GraphPad Prism 6, STAT 14.1 and SPSS Statistics v23. Pearson's test was used to assess the correlation between variables. Differences were considered statistically significant when *p* value was < 0.05.

### 1.3. Protein level estimation using western blot

The protein expression of *BACH2* and *BCL6* was confirmed using the following western blot protocol. Whole cell protein lysates were extracted from CLL cells by Pierce™ RIPA buffer (Thermo Scientific) supplemented with Halt™ Protease and Phosphatase Inhibitor Single-Use Cocktail (Thermo Scientific). Protein was then quantified by Pierce™

---

BCA Protein Assay Kit (Thermo Scientific). Equal amount of protein from each sample were loaded in 8% SDS-polyacrylamide gel electrophoresis, transferred to polyvinylidene difluoride (PVDF) membrane (Millipore) and blocked with 5% skimmed milk in Tris-Buffered Saline (TBS) with 0.1% TWEEN 20 (Sigma-Aldrich). Then PVDF membrane was incubated overnight at 4°C with primary antibody (Figure S1B) in 1% skimmed milk in TBS with 0.1% TWEEN 20, followed by corresponding secondary antibody for 1 hour at room temperature. PVDF membrane was then developed with Amersham ECL Western Blotting detection reagents (GE Healthcare) and detected by Amersham Hyperfilm ECL (GE Healthcare). To reprobe with a different antibody, PVDF membrane was stripped with ReBlot Plus Strong Antibody Stripping Solution (Millipore). Protein bands were semi-quantified by densitometry with ImageJ software.  $\beta$ -Actin was used as an endogenous control for normalisation of protein expression, and Daudi protein lysate was used as a calibrator for percentage of relative protein levels. All antibodies used in this study are listed in Figure S1B.

#### 1.4. Prognostic index model generation

Prognostic variables associated with OS were identified through univariate analysis by Cox regression models. The hazard ratio (HR) and 95 % confidence interval (CI) were calculated using Cox regression models. A two-tailed  $p$  value of  $<0.05$  was considered statistically significant. The independent prognostic variables associated with OS were confirmed by multivariate analysis using Cox proportional hazards model using forward selection. The significance of adding new variable to the model was measured using likelihood-ratio test. A prognostic index model was established based on independent variables that were significantly associated with OS in the multivariate analysis. The prognostic index then divided into two categories based on the death rates. The independent prognostic variables associated with OS were confirmed by multivariate analysis using Cox proportional hazards model. A prognostic index model was established based on independent variables that were significantly associated with OS in the multivariate analysis (Table S2C). The PI of 2.60 was established as optimal cut-point for this analysis.

#### 1.5. In vitro analyses

**Experimental model:** Human chronic B cell leukaemia MEC-1 cell line (DSMZ no: ACC 497) was used as an experimental model. Cells were grown in IMDM medium supplemented with 10% fetal bovine serum (Gibco) under standard conditions, at 37 °C in a humidified 5% CO<sub>2</sub> atmosphere. In some experiments, aiming to validate BACH2 and BCL6 cellular localization under stress conditions, cells were treated with proteasome inhibitor - bortezomib (Cell Signaling Technology, cat.no 2204) at a final concentration equal to 10 nM for all time points of sample collection from 4–24 hrs. Alternatively cells were also treated with corresponding concentration of DMSO (compound vehicle solution) as a control, mock sample. In order to perform proteomic studies (Western blot analyses) or immunofluorescence staining, cells were seeded in 12-well plates at a concentration equal to  $2 \times 10^6$  or  $1 \times 10^6$  cells/well, respectively and subjected to the bortezomib treatment. Cells were collected at a given time point and further analysed.

**Immunocytofluorescence analyses:**  $1 \times 10^6$  cells were transferred from cell culture and washed with PBS by centrifugation. Cells were fixed in 0.4% formaldehyde/PBS for 20 minutes, permeabilized with 0.3% Triton X100/PBS and smeared on a glass microscopic slide. Cells were washed twice with PBS/0.1% Tween-20 followed by blocking with 5% BSA in PBS/0.1% Tween-20 for 1 hour. Slides were incubated overnight in humidified chambers with Anti-BACH2 or Anti-BCL6 (diluted 1:100) in blocking solution at 4°C. Slides were washed three times with PBS/0.1% Tween-20 for 5 minutes and incubated for 1 hour in humidified chambers with secondary antibody (anti-rabbit IgG) conjugated with AlexaFluor 488 followed by PBS/0.1% Tween-20 rinse. Slides were incubated with Cyto-Painter Phalloidin-iFluor 680 Reagent (Abcam) for 20 minutes in room temperature, rinsed with PBS and mounted with VECTASHIELD® Antifade Mounting Medium with

DAPI (Vectashield; DAKO). Slides were analysed with epifluorescent microscope (ZEISS Axio Imager Z1). All antibodies used are listed in Figure S1B

**Co-immunoprecipitation:** Each antigen sample was prepared from  $50 \times 10^6$  cells which were transferred from the cell culture, washed with PBS by centrifugation and lysed with an ice-cold lysis buffer (25 mM Tris pH 7.4, 150 mM NaCl, 1 mM EDTA, 1% NP40, 5% glycerol and protease inhibitor cocktail) for 5 minutes. Obtained cell lysate was centrifuged at 13,000g at 4 °C for 10 minutes and collected supernatant was immediately subjected to co-immunoprecipitation procedures with application of Pierce Crosslink Magnetic IP/Co-IP Kit (Thermo Scientific, cat. no: 88805). 50 ng of Anti-BACH2, Anti-BCL6 or Anti-IgG (isotype control) antibody was coupled onto Protein A/G Magnetic Beads, covalently crosslinked with disuccinimidyl suberate (DSS) and incubated overnight at 4 °C on a rotator with an antigen sample. Beads were washed with ultrapure water to remove non-bound material and eluted in a low-pH Elution buffer. Such obtained Co-IP samples were further analyzed with Western blot and Mass spectrometry-based approaches. All antibodies used in this study are listed in Figure S1B

### 1.6. Mass spectrometry analyses

**Sample preparation:** Co-IP samples were mixed with lysis buffer (0.1 M Tris-HCL pH 8.0, 0.1 M DTT, 4% SDS) at 1:9 ratio and denatured for 10 minutes at 99°C followed by incubation at 80°C for 2h with mixing (750rpm). Next, the tubes were cooled down at 4°C for 1min and centrifuged for 15min at 14000g. The supernatant was used for protein quantification by the tryptophan fluorescence method (1) and processed using the filter-aided sample preparation (FASP) protocol as described in previous work (2). The mass spectrometry analyses were carried out as described previously (3) and the protein network and pathway influenced by the proteins detected from the co-immunoprecipitation and mass spectrometry analyses were determined using PANTHER Pathway: An Ontology-Based Pathway Database Coupled with Data Analysis Tools (4) and STRING, Protein-Protein Interaction Networks Functional Enrichment Analysis (5).

## 2. Figures and Tables

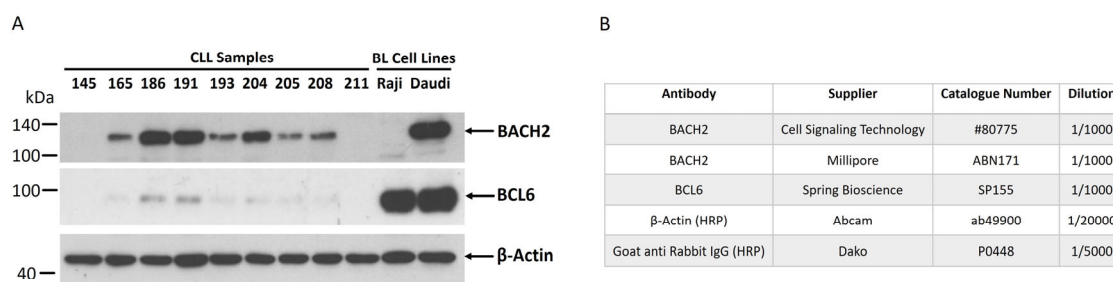

**Figure S1.** (A) Example of Western blot showing BACH2 and BCL6 protein expression in 9 CLL protein lysates. Burkitt's lymphoma cell lines Raji and Daudi were used as negative and positive controls for BACH2, respectively. (B) Antibodies names, supplier and dilution factor used for Western blotting.

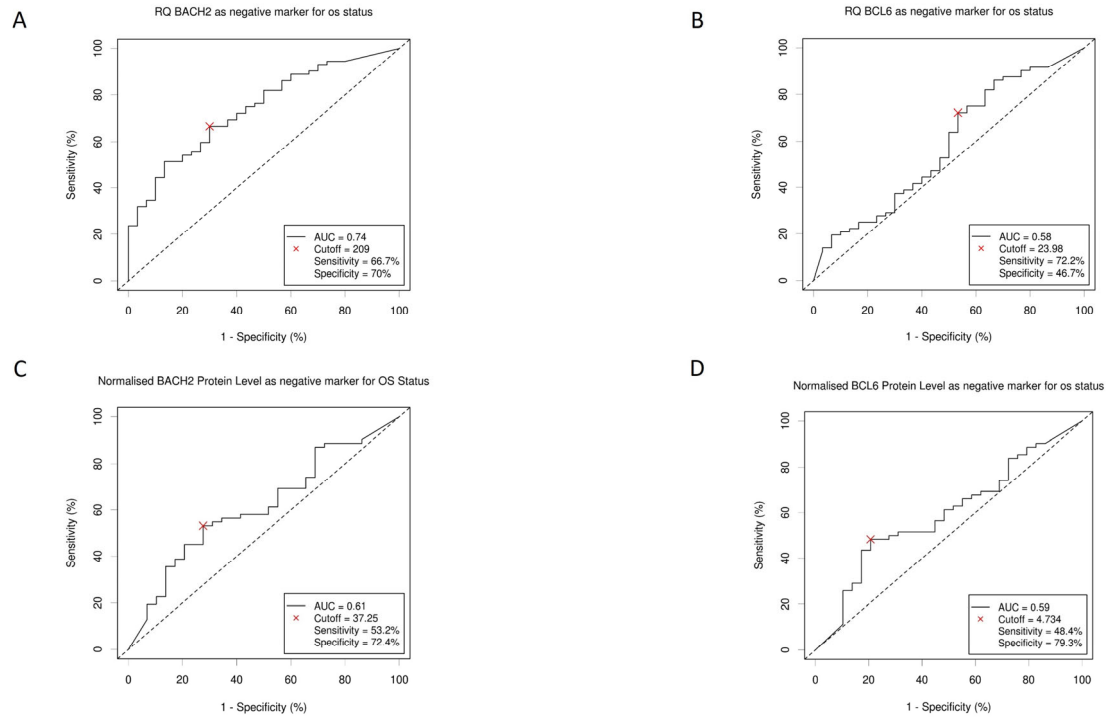

**Figure S2.** Receiver operating characteristic (ROC) curves to identify the optimal cut off for BACH2 and BCL6 RNA and protein levels. ROC analysis identified 209-fold as the best *BACH2* RNA expression cut off for predicting Overall Survival in our cohort (A) and 23.98-fold as the best *BCL6* RNA expression cut off for predicting Overall Survival in our cohort (B). ROC analysis identified 37.25 as the best BACH2 protein expression cut off for predicting Overall Survival in our cohort (C) and 4.734 as the best BCL6 protein expression cut off for predicting Overall Survival in our cohort (D).

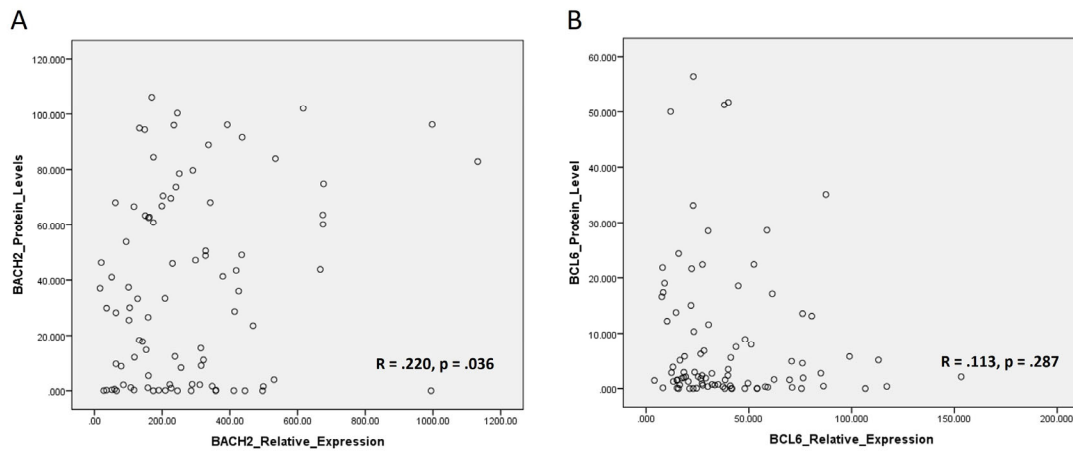

**Figure S3.** Correlation analysis for BACH2 and BCL6 expression levels. A positive correlation was found between BACH2 RNA (A) and protein levels whereas no correlation is found between BCL6 RNA and protein level (B).

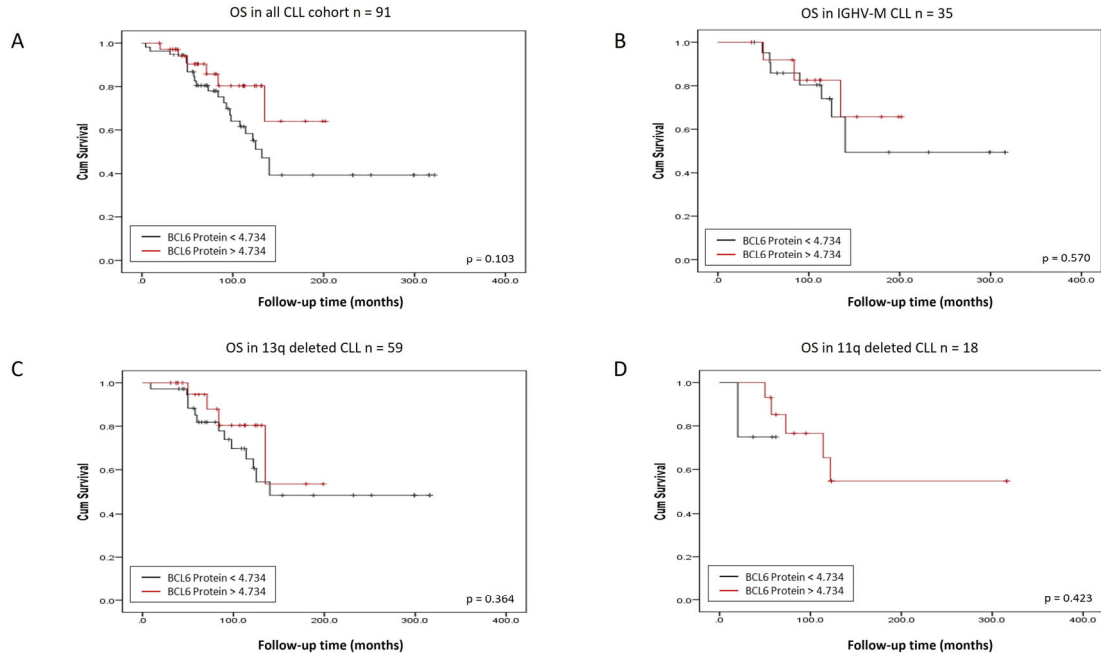

**Figure S4.** Kaplan-Meier analysis of CLL patients stratified by BCL6 protein expression. BCL6 protein low expression shows a trend in predicting shorter overall survival in whole cohort (A), BCL6 protein expression does not predict outcome in IGHV-mutated (B), 13q-deleted (C), or 11q-deleted subgroups (D).

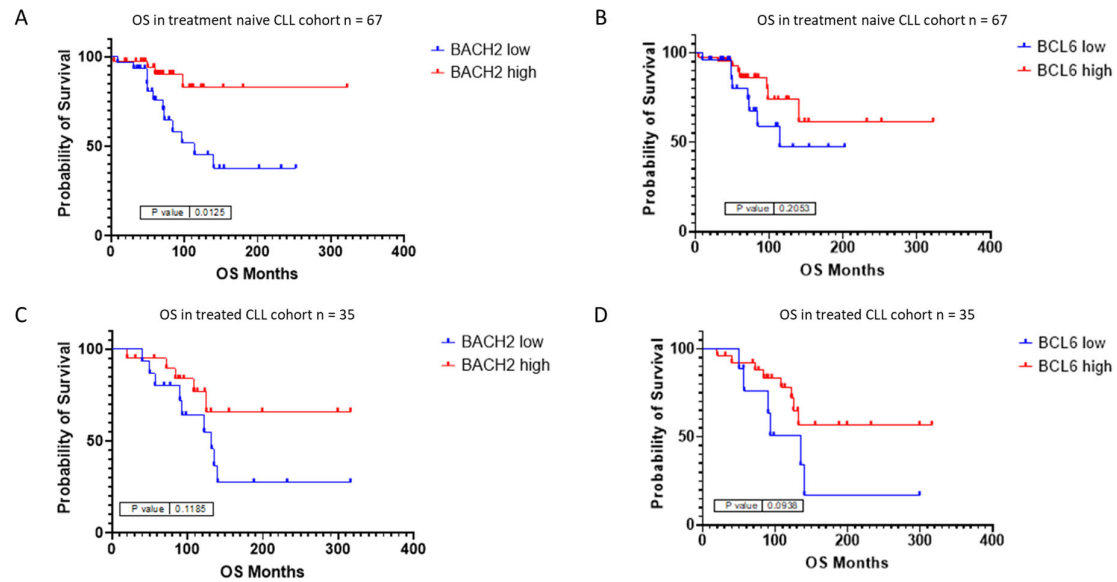

**Figure S5.** Kaplan-Meier analyses based on treatment status within the high and low RNA expressing groups of *BACH2* and *BCL6*, (A) *BACH2* expression of treatment naïve arm, (B) *BCL6* expression of treatment naïve arm, (C) *BACH2* expression of previously treated arm, (D) *BCL6* expression of previously treated arm.

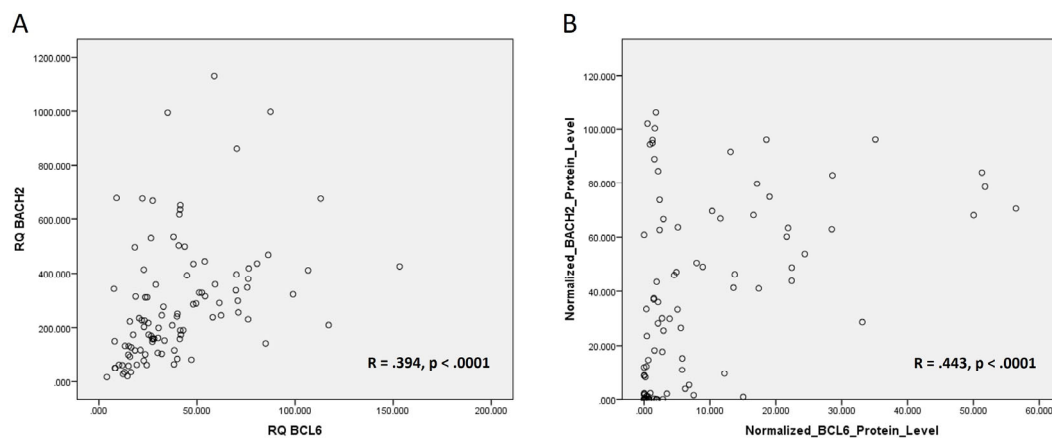

**Figure S6.** A positive correlation is found between RNA (A) and protein (B) levels of BACH2 and BCL6 indicating synergistic action of both molecules in CLL.

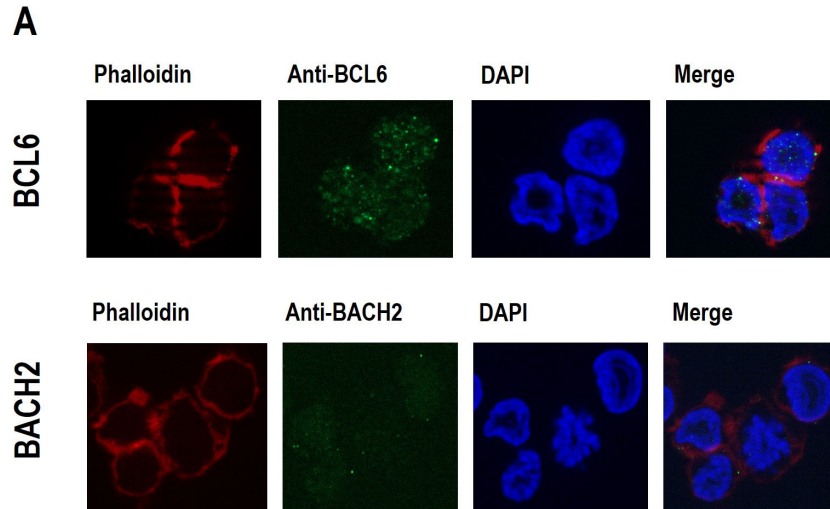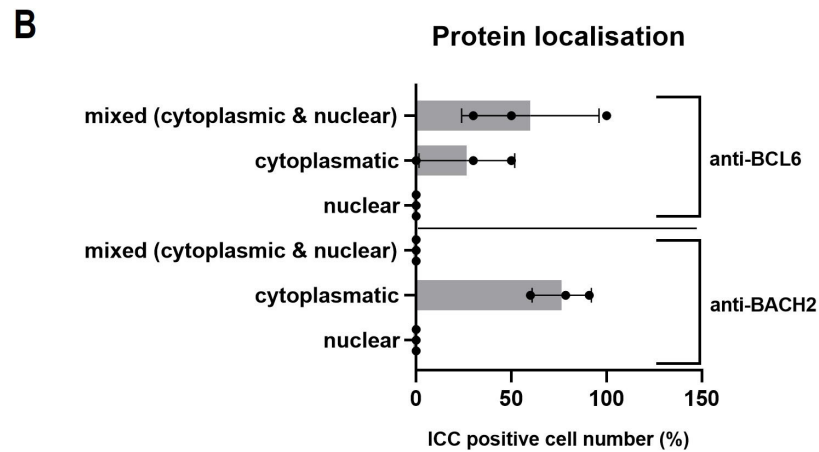

**C**

| Antibody                               | Supplier                  | Catalogue Number |
|----------------------------------------|---------------------------|------------------|
| BACH2                                  | Abcam                     | ab220988         |
| BCL6                                   | Cell Signaling Technology | #14895           |
| Goat anti-rabbit IgG (Alexa Fluor 488) | Invitrogen                | A11008           |

**Figure S7.** (A) Immunofluorescence analyses of BACH2 (green) and BCL6 (green) cellular localisation, (B) Detection of BCL6 and BACH2 localisation (cytoplasmic, nuclear or cytoplasmic & nuclear) with application of Anti-BCL6, Anti-BACH2 antibodies in MEC-1 cells, (C) Antibodies and associated supplier with its catalogue number used in immunofluorescence analysis.

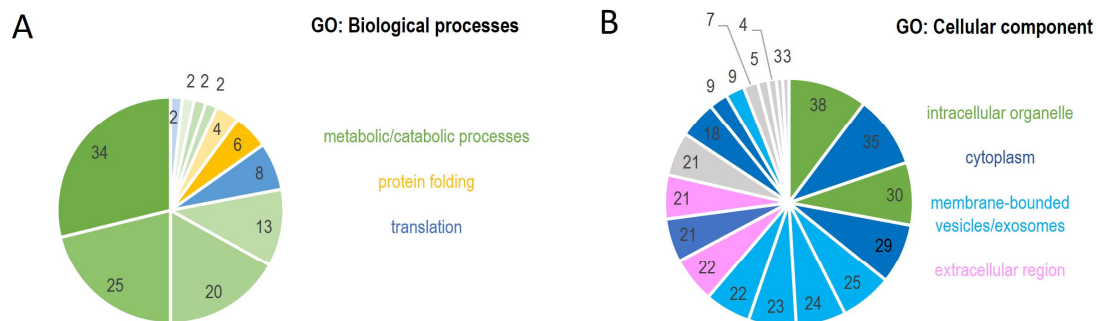

**Figure S8.** Gene Ontology (GO) term analyses of proteins interacting with both BACH2 and BCL6. Graphs represents number of genes observed in biological process (A) and cellular component (B) pathway analyses.

Uncropped WB original image for Main text: Figure 7—Immunoprecipitation (Co-IP) obtained with application of anti-BCL6, anti-BACH2 and anti-IgG (control) in MEC-1 cells.

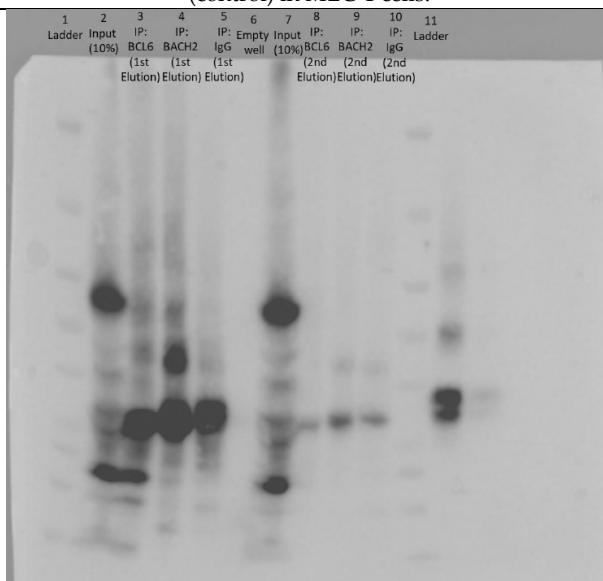

Uncropped WB original image for Supplementary material: Figure S1 (A) Example of Western blot showing BACH2 and BCL6 protein expression in 9 CLL protein lysates. Burkitt's lymphoma cell lines Raji and Daudi were used as negative and positive controls for BACH2, respectively.

BACH2

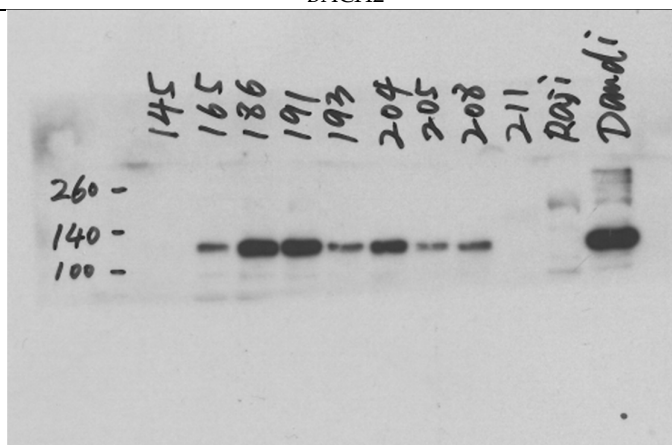



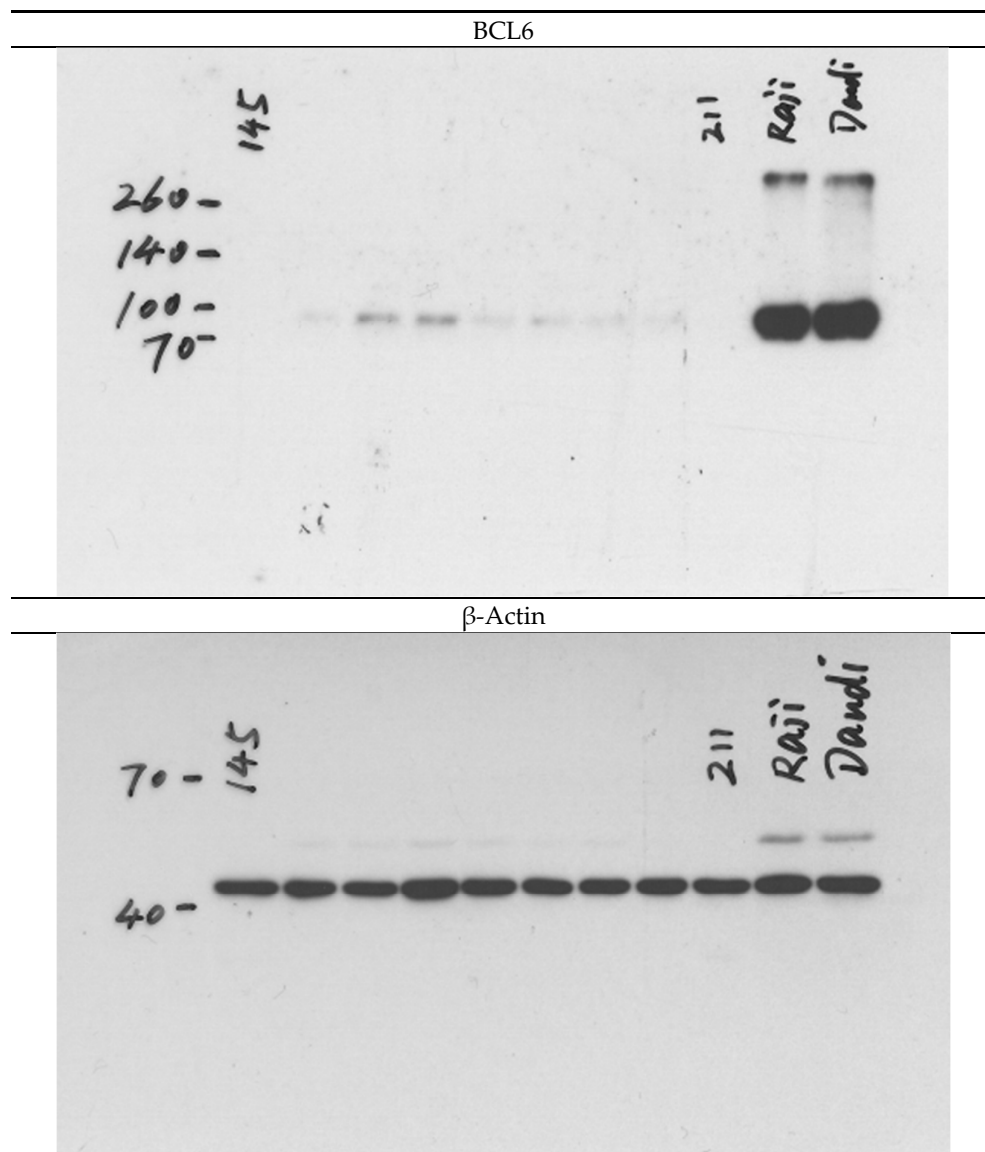

**Figure S9.** Uncropped WB original images.

**Table S1.** Treatment regime of the thirty-five treated patients in this study.

| Treatment regime, <i>n</i> = 35 | <i>N</i> | %    |
|---------------------------------|----------|------|
| C, FC                           | 1        | 2.9  |
| CF                              | 1        | 2.9  |
| CLB alone                       | 9        | 25.7 |
| CLB, Benda                      | 1        | 2.9  |
| CLB, F                          | 2        | 5.7  |
| CLB, F, FC                      | 1        | 2.9  |
| CLB, FC                         | 3        | 8.6  |
| CLB, FC, FCR                    | 2        | 5.7  |
| CLB+pred, R-CHOP, HDMP          | 1        | 2.9  |
| F alone                         | 1        | 2.9  |
| F, CLB, FC, FCR                 | 1        | 2.9  |
| F, FC                           | 1        | 2.9  |
| FC                              | 2        | 5.7  |
| FCC                             | 1        | 2.9  |

|          |   |     |
|----------|---|-----|
| FCMminiR | 1 | 2.9 |
| FCR      | 3 | 8.6 |
| R, CR    | 1 | 2.9 |
| Steroids | 3 | 8.6 |

Treatment regimens of the specific number of patients within our cohort. When patients have received several treatments, these are separated by a comma, e.g. CLB, F denoted chlorambucil followed by fludarabine. Abbreviations: Benda, Bendamustine; C, cyclophosphamide; CLB, chlorambucil; F, fludarabine; FC, fludarabine + cyclophosphamide; FCR, fludarabine + cyclophosphamide + rituximab; CLB+pred, Chlorambucil + Prednisone; R-CHOP, Rituximab + Cyclophosphamide, doxorubicin Hydrochloride, vincristine (Oncovin), Prednisone; HDMP, high-dose methylprednisone; FCMminiR, Fludarabine + Cyclophosphamide + Mitoxantrone with lower dose Rituximab.

**Table S2.** (A) The number of patients who had “high” and “low” BCL6 and BACH2 RNA and protein expression, (B) the number of patients in each molecular group separated as “high” and “low” RNA expression level based on ROC analyses.

| A                               |          |      |                                 |          |                  |      |
|---------------------------------|----------|------|---------------------------------|----------|------------------|------|
| Characteristics, <i>n</i> = 102 | <i>N</i> | %    | Characteristics, <i>n</i> = 91  | <i>N</i> | %                |      |
| <b>BACH2 RNA Expression</b>     |          |      | <b>BACH2 protein Expression</b> |          |                  |      |
| High                            | 57       | 56.0 | High                            | 41       | 45.0             |      |
| Low                             | 45       | 44.0 | Low                             | 50       | 55.0             |      |
| <b>BCL6 RNA Expression</b>      |          |      | <b>BCL6 protein Expression</b>  |          |                  |      |
| High                            | 68       | 66.7 | High                            | 36       | 39.6             |      |
| Low                             | 34       | 33.3 | Low                             | 55       | 60.4             |      |
| B                               |          |      |                                 |          |                  |      |
| Cytogenetics <i>n</i> = 101     | <i>N</i> | %    | <i>BACH2</i> High               | <i>N</i> | <i>BCL6</i> High | %    |
| 13q                             | 62       | 61.4 | 35                              | 56.5     | 42               | 67.7 |
| 11q                             | 20       | 19.8 | 12                              | 60.0     | 14               | 70.0 |
| 12+                             | 6        | 5.9  | 2                               | 33.3     | 4                | 66.7 |
| 17p                             | 8        | 7.9  | 3                               | 37.5     | 4                | 50.0 |
| Normal karyotype                | 24       | 23.8 | 12                              | 50.0     | 15               | 62.5 |

**Table S3.** (A) Correlation analysis between BACH2 relative quantity (RQ) and the most common CLL prognosticators, (B) Correlation analysis between BCL6 RQ and the most common CLL prognosticators, (C) Univariate and multivariate analysis for overall survival.

| A                   |          |         |         |               |         |                 |                |                 |               |
|---------------------|----------|---------|---------|---------------|---------|-----------------|----------------|-----------------|---------------|
|                     |          | 13q del | 11q del | Trisomy<br>12 | 17p del | ZAP70<br>status | CD38<br>status | IGHV<br>status  | TP53 mutation |
| RQ<br>BACH2         | R        | 0.03    | 0.05    | -0.11         | -0.11   | -0.33           | -0.42          | -0.14           | -0.04         |
|                     | <i>p</i> | 0.80    | 0.65    | 0.27          | 0.29    | 0.17            | 0.01           | 0.28            | 0.71          |
|                     | <i>N</i> | 101.00  | 101.00  | 101.00        | 101.00  | 19.00           | 36.00          | 63.00           | 100.00        |
| B                   |          |         |         |               |         |                 |                |                 |               |
|                     |          | 13q del | 11q del | trisomy<br>12 | 17p del | ZAP70<br>status | CD38<br>status | IGHV<br>status  | TP53 mutation |
| RQ<br>BCL6          | R        | 0.04    | 0.04    | 0.00          | -0.10   | -0.19           | 0.00           | 0.02            | -0.13         |
|                     | <i>p</i> | 0.71    | 0.70    | 0.99          | 0.31    | 0.43            | 1.00           | 0.87            | 0.22          |
|                     | <i>N</i> | 101.00  | 101.00  | 101.00        | 101.00  | 19.00           | 36.00          | 63.00           | 100.00        |
| C                   |          |         |         |               |         |                 |                |                 |               |
|                     |          |         |         |               |         | HR (95% CI)     |                | <i>p</i> -value |               |
| i) Univariate Model |          |         |         |               |         |                 |                |                 |               |

|                               |                     |       |
|-------------------------------|---------------------|-------|
| <i>BACH2</i> RQ               | 0.996(0.993–0.998)  | 0.003 |
| Age                           | 1.050(1.010–1.091)  | 0.014 |
| 17p deletion                  | 3.681(1.272–10.650) | 0.016 |
| <b>ii) Multivariate Model</b> |                     |       |
| <i>BACH2</i> RQ               | 0.995(0.992–0.998)  | 0.007 |
| Age                           | 1.055(1.016–1.095)  | 0.005 |
| 17p deletion                  | 3.438(1.127–10.492) | 0.030 |

**Table S4.** Univariate (A) and multivariate (B and C) analyses when all the covariates are considered in the same model for RNA expression level of *BACH2* and *BCL6*.

| <b>A</b>            |                     |                |
|---------------------|---------------------|----------------|
| <b>Univariate</b>   | <b>HR (95% CI)</b>  | <b>p-value</b> |
| IgVH                | 3.093(1.362–7.020)  | 0.007          |
| <b>B</b>            |                     |                |
| <b>Multivariate</b> | <b>HR</b>           | <b>p-value</b> |
| IgVH                | 5.530(2.193–13.940) | <0.001         |
| <i>BACH2</i>        | 0.996(0.992–1.00)   | 0.071          |
| Age                 | 1.099(1.045–1.154)  | <0.001         |
| 17p                 | 2.418(0.700–8.352)  | 0.163          |
| <b>C</b>            |                     |                |
| <b>Multivariate</b> | <b>HR</b>           | <b>p-value</b> |
| IgVH                | 5.946(2.355–15.012) | <0.001         |
| <i>BACH2</i>        | 0.996(0.992–0.999)  | 0.049          |
| Age                 | 1.10(1.048–1.160)   | <0.001         |

**Table S5.** Multivariate analyses when all the covariates are considered in the same model for treatment status and protein expression levels of *BACH2* and *BCL6*.

| <b>Multivariate</b>             | <b>HR</b>           | <b>p-value</b> |
|---------------------------------|---------------------|----------------|
| <i>BACH2</i> protein expression | 0.995(0.992–0.999)  | 0.005          |
| Age                             | 1.058(1.017–1.101)  | 0.005          |
| 17p                             | 3.183(1.037–9.764)  | 0.043          |
| <i>BACH2</i> protein expression | 0.994(0.991–0.998)  | 0.002          |
| Age                             | 1.057(1.013–1.103)  | 0.011          |
| 17p                             | 2.220(0.625–7.882)  | 0.217          |
| <i>BCL6</i> protein expression  | 0.962 (0.794–1.165) | 0.691          |
| <i>BACH2</i> protein expression | 0.996(0.993–0.999)  | 0.018          |
| Age                             | 1.069(1.022–1.118)  | 0.003          |
| 17p                             | 3.242(1.046–10.050) | 0.042          |
| <i>BACH2</i> protein expression | 0.439(0.185–1.039)  | 0.061          |
| <i>BACH2</i> protein expression | 0.996(0.993–0.999)  | 0.018          |
| Age                             | 1.07(1.020–1.115)   | 0.004          |
| 17p status                      | 3.33(1.067–10.373)  | 0.038          |
| <i>BCL6</i> protein expression  | 0.760(0.250–2.307)  | 0.628          |
| Treatment Status                | 0.780(0.354–1.717)  | 0.537          |

**Table S6.** Proteins co-immunoprecipitated with *BACH2* or *BCL6* detected from the co-immunoprecipitation and subsequent MS studies.

| <b>Proteins co-immunoprecipitated with <i>BACH2</i> or <i>BCL6</i></b> | <b>Name and Function</b>                         |
|------------------------------------------------------------------------|--------------------------------------------------|
| Q9NTK5                                                                 | Obg like ATPase 1                                |
| O43166                                                                 | Signal induced proliferation associated 1 like 1 |

|        |                                                                                |
|--------|--------------------------------------------------------------------------------|
| Q8WW12 | PEST proteolytic signal containing nuclear protein                             |
| P18084 | Integrin subunit beta 5                                                        |
| Q6ZMT4 | Lysine demethylase 7A                                                          |
| P00403 | Mitochondrially encoded cytochrome c oxidase II                                |
| P53618 | Coatomer protein complex subunit beta                                          |
| P17174 | Glutamic-oxaloacetic transaminase 1                                            |
| Q99832 | Chaperonin containing TCP1 subunit 7                                           |
| P16885 | Phospholipase C gamma 2                                                        |
| Q5RKV6 | Exosome component 6                                                            |
| P49321 | Nuclear autoantigenic sperm protein                                            |
| P55036 | Proteasome 26S subunit, non-ATPase 4                                           |
| P04843 | Ribophorin I                                                                   |
| P00505 | Glutamic-oxaloacetic transaminase 2                                            |
| P05455 | Sjogren syndrome antigen B                                                     |
| Q9Y5A9 | YTH N6-methyladenosine RNA binding protein 2                                   |
| P25786 | Proteasome subunit alpha 1                                                     |
| Q14697 | Glucosidase II alpha subunit                                                   |
| Q15181 | Pyrophosphatase (inorganic) 1                                                  |
| P61221 | ATP binding cassette subfamily E member 1                                      |
| Q9Y285 | Phenylalanyl-tRNA synthetase alpha subunit                                     |
| O43809 | Nudix hydrolase 21                                                             |
| Q14204 | Dynein cytoplasmic 1 heavy chain 1                                             |
| Q9H9B4 | Sideroflexin 1                                                                 |
| Q15046 | Lysyl-tRNA synthetase                                                          |
| P08758 | Annexin A5                                                                     |
| P54819 | Adenylate kinase 2                                                             |
| P50991 | Chaperonin containing TCP1 subunit 4                                           |
| P30041 | Peroxiredoxin 6                                                                |
| O75347 | Tubulin folding cofactor A                                                     |
| Q99798 | Aconitase 2                                                                    |
| O76094 | Signal recognition particle 72                                                 |
| P37837 | Transaldolase 1                                                                |
| Q13428 | Treacle ribosome biogenesis factor 1                                           |
| P58505 | Chromosome 21 open reading frame 58                                            |
| Q13011 | Enoyl-CoA hydratase 1                                                          |
| P52566 | Rho GDP dissociation inhibitor beta                                            |
| Q96RU3 | Formin binding protein 1                                                       |
| P54727 | RAD23 homolog B, nucleotide excision repair protein                            |
| Q96RP9 | G elongation factor mitochondrial 1                                            |
| P24539 | ATP synthase, H <sup>+</sup> transporting, mitochondrial Fo complex subunit B1 |
| Q86UV5 | Ubiquitin specific peptidase 48                                                |
| Q9Y4P3 | Transducin beta like 2                                                         |
| P07355 | Annexin A2                                                                     |
| Q9P2E9 | Ribosome binding protein 1                                                     |
| Q96AE4 | Far upstream element binding protein 1                                         |
| P30405 | Peptidylprolyl isomerase F                                                     |
| P62495 | Eukaryotic translation termination factor 1                                    |
| P49368 | Chaperonin containing TCP1 subunit 3                                           |

**Table S7.** Proteins and their function that exclusively associated with BACH2 and BCL6 detected from the co-immunoprecipitation and subsequent MS studies.

| BACH2  | Name     | Protein function                                                                                                         | BCL6   | Name     | Protein function                               |
|--------|----------|--------------------------------------------------------------------------------------------------------------------------|--------|----------|------------------------------------------------|
| Q99460 | PSMD1    | Component of 26S proteasome, a multiprotein complex involved in the ATP-dependent degradation of ubiquitinated proteins. | Q8WYA6 | CTNBL1   | Beta-catenin-like protein 1.                   |
| P84095 | RHOG     | RAS homolog family member G, Rho-related GTP-binding protein.                                                            | Q5VYK3 | KIAA0368 | Proteasome adapter and scaffold protein ECM29. |
| Q6NUM9 | RETSAT   | All-trans-retinol 13,14-reductase.                                                                                       | P61204 | ARF3     | ADP-ribosylation factor 3.                     |
| P62263 | RPS14    | 40S ribosomal protein S14.                                                                                               | Q15833 | STXBP2   | Syntaxin-binding protein 2.                    |
| Q86V59 | PNMA8A   | Paraneoplastic antigen-like protein 8A.                                                                                  | Q99623 | PHB2     | Prohibitin 2.                                  |
| P02533 | KRT14    | Keratin, type I cytoskeletal 14.                                                                                         | P07602 | PSAP     | Prosaposin.                                    |
| P15924 | DSP      | Desmoplakin, major high molecular weight protein of desmosomes.                                                          | P25205 | MCM3     | DNA replication licensing factor MCM3.         |
| Q15020 | SART3    | Squamous cell carcinoma antigen recognized by T-cells 3.                                                                 | P33991 | MCM4     | DNA replication licensing factor MCM4.         |
| O00487 | PSMD14   | 26S proteasome non-ATPase regulatory subunit 14.                                                                         | O75553 | DAB1     | Disabled homolog 1.                            |
| Q96A19 | CCDC102A | Coiled-coil domain containing 102A.                                                                                      |        |          |                                                |

**Table S8.** Gene Ontology (GO) term analyses of proteins interacting with both BACH2 and BCL6 in biological process and cellular component.

## References

- Wiśniewski, J.R.; Gaugaz, F.Z. Fast and Sensitive Total Protein and Peptide Assays for Proteomic Analysis. *Analytical Chemistry*. **2015**, *87*, 4110–4116.
- Wiśniewski, J.R.; Duś, K.; Mann, M. Proteomic workflow for analysis of archival formalin-fixed and paraffin-embedded clinical samples to a depth of 10 000 proteins. *PROTEOMICS – Clinical Applications*. **2013**, *7*, 225–233.
- Gawin, M.; Wojakowska, A.; Pietrowska, M.; Marczak, Ł.; Chekan, M.; Jelonek, K.; et al. Proteome profiles of different types of thyroid cancers. *Molecular and Cellular Endocrinology*. **2018**, *472*, 68–79.
- Mi, H.; Thomas, P. PANTHER pathway: an ontology-based pathway database coupled with data analysis tools. *Methods in molecular biology (Clifton, NJ)*. **2009**, *563*, 123–140.
- Jensen, L.J.; Kuhn, M.; Stark, M.; Chaffron, S.; Creevey, C.; Muller, J.; et al. STRING 8—a global view on proteins and their functional interactions in 630 organisms. *Nucleic Acids Research*. **2008**, *37*, D412–D416.
